# Supplementary material for: Effects of topographic and meteorological parameters on the surface area loss of ice aprons in the Mont Blanc massif (European Alps)
Source: Copernicus journal article supplement (doi:10.5194/tc-16-4251-2022), 2022-10-12
Supplement: Supplementary file 1 [file Supplementary material 1.xlsx]

## Sheet: Sheet1
Federal	Office	of	Meteorology	and	Climatology	MeteoSwiss
MeteoSchweiz	/	MeteoSuisse	/	MeteoSvizzera	/	MeteoSwiss
Monthly	homogenized	values
Station:	Col	du	Grand	St-Bernard
Altitude	[m	asl]:	2472	m
Coordinates:	45°	52.1'	N	/	7°	10.2'	E
Reference	date	of	homogenization:
	Temperature:	01.12.2013
	Precipitation:	01.12.2010
Last	inhomogeneity	provisionally	corrected:
	Temperature:	no
	Precipitation:	yes
Units:
	Temperature:	°C
	Precipitation:	mm
Missing	values:	NA
Data	source:	MeteoSwiss
Creation	date:	20.11.2021
Year	Month	Temperature	Precipitation
1864	1	-9.4	NA
1864	2	-10.2	NA
1864	3	-6.8	NA
1864	4	-4.3	NA
1864	5	0.6	NA
1864	6	2.2	NA
1864	7	6.4	NA
1864	8	5	NA
1864	9	2.6	NA
1864	10	-2.6	NA
1864	11	-6.1	NA
1864	12	-7.9	NA
1865	1	-8.9	NA
1865	2	-11.8	NA
1865	3	-13.1	NA
1865	4	-0.6	NA
1865	5	2	NA
1865	6	4.1	NA
1865	7	7.2	NA
1865	8	5.4	NA
1865	9	6.4	NA
1865	10	-1.9	NA
1865	11	-4.2	NA
1865	12	-5.9	NA
1866	1	-6.1	NA
1866	2	-6.4	NA
1866	3	-8.3	NA
1866	4	-3.1	NA
1866	5	-1.5	NA
1866	6	4.4	NA
1866	7	5.5	NA
1866	8	3.7	NA
1866	9	2.8	NA
1866	10	-0.6	NA
1866	11	-5.2	NA
1866	12	-4	NA
1867	1	-7.9	NA
1867	2	-5.4	NA
1867	3	-6.2	NA
1867	4	-3.2	NA
1867	5	0.7	NA
1867	6	3.4	NA
1867	7	4.8	NA
1867	8	6.3	NA
1867	9	5	NA
1867	10	-3.5	NA
1867	11	-5.8	NA
1867	12	-10.7	NA
1868	1	-9.2	NA
1868	2	-6	NA
1868	3	-9.2	NA
1868	4	-4.7	NA
1868	5	4.4	NA
1868	6	4.7	NA
1868	7	6	NA
1868	8	5.9	NA
1868	9	4.4	NA
1868	10	-2	NA
1868	11	-6.7	NA
1868	12	-4.6	NA
1869	1	-9.2	NA
1869	2	-4.4	NA
1869	3	-11.1	NA
1869	4	-2.5	NA
1869	5	1.8	NA
1869	6	1.1	NA
1869	7	8.6	NA
1869	8	4.9	NA
1869	9	4.1	NA
1869	10	-3.6	NA
1869	11	-4.8	NA
1869	12	-9.9	NA
1870	1	-10.1	NA
1870	2	-8.9	NA
1870	3	-8.2	NA
1870	4	-4.3	NA
1870	5	2	NA
1870	6	4.2	NA
1870	7	7.4	NA
1870	8	2.9	NA
1870	9	2.9	NA
1870	10	-2.4	NA
1870	11	-6.5	NA
1870	12	-11.4	NA
1871	1	-12.7	NA
1871	2	-6.1	NA
1871	3	-6.3	NA
1871	4	-3.3	NA
1871	5	0	NA
1871	6	-0.1	NA
1871	7	6.4	NA
1871	8	6.6	NA
1871	9	5.1	NA
1871	10	-1.9	NA
1871	11	-8.3	NA
1871	12	-11	NA
1872	1	-8.9	NA
1872	2	-7.3	NA
1872	3	-6.6	NA
1872	4	-2.9	NA
1872	5	-1.5	NA
1872	6	3.3	NA
1872	7	6.9	NA
1872	8	5.1	NA
1872	9	4.4	NA
1872	10	-1.7	NA
1872	11	-4.8	NA
1872	12	-6.7	NA
1873	1	-7.3	NA
1873	2	-9.3	NA
1873	3	-5.3	NA
1873	4	-6.2	NA
1873	5	-2	NA
1873	6	2.6	NA
1873	7	7.9	NA
1873	8	7.1	NA
1873	9	3.3	NA
1873	10	-0.6	NA
1873	11	-4.8	NA
1873	12	-4.9	NA
1874	1	-6.4	NA
1874	2	-9.5	NA
1874	3	-7.8	NA
1874	4	-2.8	NA
1874	5	-3.7	NA
1874	6	4.1	NA
1874	7	8.1	NA
1874	8	5.1	NA
1874	9	4.8	NA
1874	10	-0.2	NA
1874	11	-7.2	NA
1874	12	-11.7	NA
1875	1	-5.5	NA
1875	2	-11.3	NA
1875	3	-7.9	NA
1875	4	-4.2	NA
1875	5	2.6	NA
1875	6	4	NA
1875	7	4.8	NA
1875	8	7.6	NA
1875	9	4.6	NA
1875	10	-2.2	NA
1875	11	-7.1	NA
1875	12	-8.6	NA
1876	1	-7.9	NA
1876	2	-7.7	NA
1876	3	-7.8	NA
1876	4	-4.4	NA
1876	5	-2.1	NA
1876	6	3	NA
1876	7	6.8	NA
1876	8	6.4	NA
1876	9	1.8	NA
1876	10	1.7	NA
1876	11	-7.2	NA
1876	12	-5.5	NA
1877	1	-7.9	NA
1877	2	-8.5	NA
1877	3	-8.9	NA
1877	4	-4.7	NA
1877	5	-2.3	NA
1877	6	6.1	NA
1877	7	5.4	NA
1877	8	7.9	NA
1877	9	1.7	NA
1877	10	-3.2	NA
1877	11	-3.5	NA
1877	12	-8.3	NA
1878	1	-10.3	NA
1878	2	-5	NA
1878	3	-9.1	NA
1878	4	-3.4	NA
1878	5	0.9	NA
1878	6	3.2	NA
1878	7	5.6	NA
1878	8	6.6	NA
1878	9	4.7	NA
1878	10	-0.8	NA
1878	11	-9.1	NA
1878	12	-11.9	NA
1879	1	-8.5	NA
1879	2	-8.7	NA
1879	3	-5.6	NA
1879	4	-6.7	NA
1879	5	-3.8	NA
1879	6	3.9	NA
1879	7	3.3	NA
1879	8	9.1	NA
1879	9	3.3	NA
1879	10	-0.4	NA
1879	11	-8.1	NA
1879	12	-10.1	NA
1880	1	-8.5	NA
1880	2	-6.8	NA
1880	3	-3.3	NA
1880	4	-3.4	NA
1880	5	-0.6	NA
1880	6	1.8	NA
1880	7	7.8	NA
1880	8	4.8	NA
1880	9	4.4	NA
1880	10	0	NA
1880	11	-3.6	NA
1880	12	-4.6	NA
1881	1	-11.1	NA
1881	2	-7.6	NA
1881	3	-4.4	NA
1881	4	-4.1	NA
1881	5	-0.8	NA
1881	6	2.4	NA
1881	7	8.7	NA
1881	8	6.9	NA
1881	9	1.7	NA
1881	10	-4.7	NA
1881	11	-0.4	NA
1881	12	-7.1	NA
1882	1	-3.4	NA
1882	2	-6	NA
1882	3	-3.9	NA
1882	4	-4.5	NA
1882	5	0.6	NA
1882	6	2.7	NA
1882	7	4.5	NA
1882	8	4.5	NA
1882	9	0.9	NA
1882	10	-1.7	NA
1882	11	-5.8	NA
1882	12	-7	NA
1883	1	-8.1	NA
1883	2	-6.2	NA
1883	3	-10.8	NA
1883	4	-6	NA
1883	5	-0.1	NA
1883	6	2.5	NA
1883	7	3.8	NA
1883	8	6.1	NA
1883	9	1.7	NA
1883	10	-1.5	NA
1883	11	-4.7	NA
1883	12	-7	NA
1884	1	-5.4	NA
1884	2	-6.3	NA
1884	3	-5.9	NA
1884	4	-4.7	NA
1884	5	1.2	NA
1884	6	-0.2	NA
1884	7	6.1	NA
1884	8	6.2	NA
1884	9	3.1	NA
1884	10	-2.7	NA
1884	11	-6.3	NA
1884	12	-6.3	NA
1885	1	-9.7	NA
1885	2	-5.1	NA
1885	3	-6.4	NA
1885	4	-3.9	NA
1885	5	-2	NA
1885	6	4.7	NA
1885	7	7	NA
1885	8	5.6	NA
1885	9	3	NA
1885	10	-4.2	NA
1885	11	-3.6	NA
1885	12	-6.8	NA
1886	1	-10.7	NA
1886	2	-9.7	NA
1886	3	-7.4	NA
1886	4	-3.2	NA
1886	5	0	NA
1886	6	1.4	NA
1886	7	6.5	NA
1886	8	5.9	NA
1886	9	5	NA
1886	10	-0.3	NA
1886	11	-4.7	NA
1886	12	-9.7	NA
1887	1	-8.4	NA
1887	2	-9.1	NA
1887	3	-6.8	NA
1887	4	-5.1	NA
1887	5	-2.9	NA
1887	6	4.8	NA
1887	7	7.6	NA
1887	8	6	NA
1887	9	3.3	NA
1887	10	-4.9	NA
1887	11	-6.6	NA
1887	12	-10.8	NA
1888	1	-8.6	NA
1888	2	-10.8	NA
1888	3	-8.8	NA
1888	4	-6	NA
1888	5	0.8	NA
1888	6	3.5	NA
1888	7	3.2	NA
1888	8	4.7	NA
1888	9	3.3	NA
1888	10	-1.8	NA
1888	11	-3.8	NA
1888	12	-4.7	NA
1889	1	-7.8	NA
1889	2	-11.7	NA
1889	3	-10.1	NA
1889	4	-6.1	NA
1889	5	0.6	NA
1889	6	4.1	NA
1889	7	5.1	NA
1889	8	5.4	NA
1889	9	2.2	NA
1889	10	-2.5	NA
1889	11	-3.4	NA
1889	12	-9	NA
1890	1	-4.8	NA
1890	2	-10	NA
1890	3	-7.5	NA
1890	4	-5.5	NA
1890	5	-0.2	NA
1890	6	2.6	NA
1890	7	4.1	NA
1890	8	5.4	NA
1890	9	2.7	NA
1890	10	-2.1	NA
1890	11	-6.7	NA
1890	12	-10	NA
1891	1	-11.3	NA
1891	2	-6.2	NA
1891	3	-8.8	NA
1891	4	-6.6	NA
1891	5	-1	NA
1891	6	2.9	NA
1891	7	4.9	NA
1891	8	4.3	NA
1891	9	4.4	NA
1891	10	-0.2	NA
1891	11	-4.9	NA
1891	12	-5.7	NA
1892	1	-8.7	NA
1892	2	-8.5	NA
1892	3	-9.2	NA
1892	4	-3.6	NA
1892	5	-0.1	NA
1892	6	4.2	NA
1892	7	5.8	NA
1892	8	7.1	NA
1892	9	4.1	NA
1892	10	-3.1	NA
1892	11	-3.1	NA
1892	12	-8.6	NA
1893	1	-12.3	NA
1893	2	-8.2	NA
1893	3	-4.8	NA
1893	4	-1	NA
1893	5	-0.6	NA
1893	6	3.3	NA
1893	7	5.4	NA
1893	8	7.1	NA
1893	9	3.2	NA
1893	10	1	NA
1893	11	-5.1	NA
1893	12	-7	NA
1894	1	-9.3	NA
1894	2	-6.3	NA
1894	3	-5.8	NA
1894	4	-1.8	NA
1894	5	-0.4	NA
1894	6	3.1	NA
1894	7	6.4	NA
1894	8	6.2	NA
1894	9	1.9	NA
1894	10	-1.4	NA
1894	11	-2.8	NA
1894	12	-7.7	NA
1895	1	-14.2	NA
1895	2	-11.8	NA
1895	3	-7.8	NA
1895	4	-2.6	NA
1895	5	-0.7	NA
1895	6	2.8	NA
1895	7	6.9	NA
1895	8	6	NA
1895	9	7.6	NA
1895	10	-1.9	NA
1895	11	-1.7	NA
1895	12	-7.5	NA
1896	1	-7.2	NA
1896	2	-5.2	NA
1896	3	-5.6	NA
1896	4	-6.7	NA
1896	5	-1.6	NA
1896	6	2.9	NA
1896	7	6.2	NA
1896	8	2.6	NA
1896	9	2.2	NA
1896	10	-3.8	NA
1896	11	-7	NA
1896	12	-7.9	NA
1897	1	-10.1	NA
1897	2	-4.5	NA
1897	3	-5.1	NA
1897	4	-3.9	NA
1897	5	-1.3	NA
1897	6	5.2	NA
1897	7	6.3	NA
1897	8	6.2	NA
1897	9	2	NA
1897	10	-1.6	NA
1897	11	-2.3	NA
1897	12	-6.4	NA
1898	1	-3.8	NA
1898	2	-8.6	NA
1898	3	-6.8	NA
1898	4	-3.6	NA
1898	5	-1.4	NA
1898	6	2.5	NA
1898	7	4.7	NA
1898	8	7.8	NA
1898	9	6.7	NA
1898	10	0.2	NA
1898	11	-3.6	NA
1898	12	-6	NA
1899	1	-6.9	NA
1899	2	-4.6	NA
1899	3	-6.2	NA
1899	4	-4.9	NA
1899	5	-1.1	NA
1899	6	2.9	NA
1899	7	5.6	NA
1899	8	7.8	NA
1899	9	2.9	NA
1899	10	2.2	NA
1899	11	-1.5	NA
1899	12	-8.3	NA
1900	1	-8.5	NA
1900	2	-6.5	NA
1900	3	-10.5	NA
1900	4	-5.1	NA
1900	5	-0.4	NA
1900	6	3.8	NA
1900	7	6.9	NA
1900	8	5.2	NA
1900	9	5.9	NA
1900	10	0.6	NA
1900	11	-5.7	NA
1900	12	-4	NA
1901	1	-8.7	172.1
1901	2	-14.6	86.5
1901	3	-9.6	306.5
1901	4	-3.4	372.3
1901	5	-0.2	74.8
1901	6	4.7	165.2
1901	7	6.4	120.6
1901	8	6.4	89.1
1901	9	3.3	230
1901	10	-1.4	410.5
1901	11	-5.1	41.3
1901	12	-7.8	299.6
1902	1	-5.7	209
1902	2	-8.3	196.6
1902	3	-6.2	263
1902	4	-1.8	175.2
1902	5	-4.1	235.1
1902	6	2.2	95.5
1902	7	6.8	85.2
1902	8	5.5	134.8
1902	9	3.6	72
1902	10	-2	231.2
1902	11	-5.4	148.3
1902	12	-7.5	134.5
1903	1	-7.7	165.9
1903	2	-4.7	103.5
1903	3	-6.3	174.4
1903	4	-7.9	134.7
1903	5	-0.4	300
1903	6	2.3	231.7
1903	7	5	137.2
1903	8	6.8	150.1
1903	9	3.2	112.4
1903	10	-0.5	385.7
1903	11	-4.9	181.1
1903	12	-9.1	144.4
1904	1	-8.7	151.3
1904	2	-9.8	367.9
1904	3	-7.4	135.1
1904	4	-2.3	236.2
1904	5	1.7	122.2
1904	6	4.7	197.8
1904	7	8.5	71.5
1904	8	7.4	99.5
1904	9	1.4	87.8
1904	10	-0.3	110.5
1904	11	-5.1	68.7
1904	12	-5.5	132
1905	1	-10.5	75.6
1905	2	-9.5	122.8
1905	3	-6.4	282.7
1905	4	-4	206.1
1905	5	-1	280.3
1905	6	3.3	233.9
1905	7	8.6	140.6
1905	8	5.9	266.3
1905	9	3.3	252.9
1905	10	-5.4	173
1905	11	-7.3	292.1
1905	12	-4.5	83.9
1906	1	-7.7	159.7
1906	2	-11	252.3
1906	3	-7.3	167.2
1906	4	-5.5	198.7
1906	5	-0.1	205.9
1906	6	3.4	26.8
1906	7	6.3	131.7
1906	8	8.1	22.6
1906	9	3.6	40.6
1906	10	1.4	132.4
1906	11	-3	333.3
1906	12	-12	269.8
1907	1	-8.4	178.5
1907	2	-10.6	106.9
1907	3	-8	193.9
1907	4	-6.2	170.8
1907	5	0	195.9
1907	6	3.9	147.4
1907	7	4.7	202.4
1907	8	7.8	162.1
1907	9	4.7	146.2
1907	10	-0.9	486.3
1907	11	-4	126.5
1907	12	-6.5	313.2
1908	1	-6.8	68.7
1908	2	-8.5	266.3
1908	3	-9.7	223.1
1908	4	-6.9	137.4
1908	5	2.1	200.9
1908	6	4.4	188.5
1908	7	5.4	111.3
1908	8	5.6	80.5
1908	9	3.6	144.7
1908	10	1	55.8
1908	11	-4	116
1908	12	-8.2	164.8
1909	1	-8.7	172.9
1909	2	-11.4	88.3
1909	3	-10.6	198.1
1909	4	-2.1	166.6
1909	5	-0.1	96.9
1909	6	1	248.3
1909	7	4.3	104.9
1909	8	6.2	203.5
1909	9	1.6	112.1
1909	10	0	247.9
1909	11	-6.3	66.3
1909	12	-6.9	360
1910	1	-7.8	328.4
1910	2	-9.4	214.2
1910	3	-7	133.7
1910	4	-5.6	201.1
1910	5	-2.4	164.4
1910	6	3.3	147.8
1910	7	3.9	128.9
1910	8	5.5	119.2
1910	9	1	152.8
1910	10	-0.4	245.4
1910	11	-7.5	488.3
1910	12	-6.8	344.4
1911	1	-7.7	51.3
1911	2	-6.9	157.4
1911	3	-8	227.3
1911	4	-4.9	79
1911	5	-0.3	135.3
1911	6	2.9	253.3
1911	7	8.5	31.9
1911	8	9.4	53.9
1911	9	5.7	166.6
1911	10	-1.3	187.4
1911	11	-3.9	236.1
1911	12	-6.1	248.5
1912	1	-6.3	129.8
1912	2	-5.3	213.1
1912	3	-5.4	355.2
1912	4	-5.7	155.7
1912	5	1.1	139.7
1912	6	3.1	201.5
1912	7	5.2	100.5
1912	8	2.9	276.3
1912	9	-1.2	45.4
1912	10	-1.5	265.7
1912	11	-7.8	153.2
1912	12	-4.2	186.8
1913	1	-7	253.3
1913	2	-7.8	67.2
1913	3	-4.7	236.8
1913	4	-5	284.4
1913	5	-0.6	236.2
1913	6	2.8	134.5
1913	7	3.5	125.8
1913	8	5.8	90.8
1913	9	2.3	251.9
1913	10	0.6	132.1
1913	11	-3	340.4
1913	12	-7.2	205
1914	1	-9.3	128.8
1914	2	-5	168.8
1914	3	-6.6	706.7
1914	4	-1.5	160.5
1914	5	-0.9	316.9
1914	6	2.1	89.3
1914	7	3.6	285.1
1914	8	6.2	146.5
1914	9	2.7	126
1914	10	-1.5	187.1
1914	11	-6.2	199.9
1914	12	-7.2	224.5
1915	1	-11.3	330.6
1915	2	-10.3	183.1
1915	3	-7.4	148.8
1915	4	-5.5	223.6
1915	5	2.2	113
1915	6	4.5	145.6
1915	7	5.8	238.7
1915	8	5.3	100.8
1915	9	2.2	175.8
1915	10	-3.6	124.4
1915	11	-7.5	182.5
1915	12	-4.9	297.2
1916	1	-5.1	125.3
1916	2	-9.4	264.2
1916	3	-7.3	280.5
1916	4	-4.2	253.7
1916	5	0.7	174.2
1916	6	1.8	146
1916	7	5	93
1916	8	5.7	113.6
1916	9	1.5	151.3
1916	10	-0.6	212
1916	11	-5.6	211.5
1916	12	-7.6	454.2
1917	1	-11.1	88.9
1917	2	-9.7	22.2
1917	3	-9.5	233.4
1917	4	-7.4	133.9
1917	5	1.6	271.7
1917	6	5	143
1917	7	6.5	207.5
1917	8	5.4	169.3
1917	9	6	58.4
1917	10	-3.6	342.1
1917	11	-4.3	131
1917	12	-10.4	134
1918	1	-7.4	174
1918	2	-6.2	72.4
1918	3	-7.5	164.4
1918	4	-5.1	270.1
1918	5	1	94.7
1918	6	1.6	249.9
1918	7	6.1	80.1
1918	8	6.2	99
1918	9	4.7	207.2
1918	10	-2.4	231.4
1918	11	-5	193
1918	12	-4.8	459.8
1919	1	-9.9	91.5
1919	2	-8.9	124
1919	3	-7.8	150.4
1919	4	-6.1	175
1919	5	-0.2	30
1919	6	3.9	59.8
1919	7	2.7	118.1
1919	8	7.9	23.1
1919	9	4.6	73.7
1919	10	-4.7	157.8
1919	11	-8.6	232
1919	12	-7.2	242.8
1920	1	-6.2	381.6
1920	2	-5.1	42.1
1920	3	-4	246.3
1920	4	-3.6	258
1920	5	3.3	99.3
1920	6	3.5	132
1920	7	6.5	94.7
1920	8	5	114.6
1920	9	3.3	281.6
1920	10	-0.7	86.6
1920	11	-3.7	93.7
1920	12	-6.5	73.9
1921	1	-5.3	99.4
1921	2	-8	40.7
1921	3	-5.5	89.8
1921	4	-5.4	175.4
1921	5	1.2	127.3
1921	6	4.3	134.7
1921	7	8.4	115.5
1921	8	6.3	156.6
1921	9	6.3	67.9
1921	10	3.7	41.7
1921	11	-5.4	80.1
1921	12	-6	76
1922	1	-10	267.8
1922	2	-6.4	189.6
1922	3	-5.7	248.8
1922	4	-6.1	441.8
1922	5	2.2	63.2
1922	6	4	135.6
1922	7	5.3	196.9
1922	8	7.3	158.6
1922	9	1.5	213.8
1922	10	-1.6	157.2
1922	11	-6	174
1922	12	-7.4	229
1923	1	-9.3	136.4
1923	2	-6.7	252.5
1923	3	-6.8	116.2
1923	4	-4.2	177.1
1923	5	0.4	195.5
1923	6	0.7	115.5
1923	7	8.5	41.4
1923	8	8.9	133.5
1923	9	3.2	108
1923	10	1.5	204.2
1923	11	-5.5	271.3
1923	12	-9.2	272.4
1924	1	-7.9	78.7
1924	2	-10.4	120
1924	3	-6.4	65.8
1924	4	-3.8	236.7
1924	5	2	201.8
1924	6	4.2	187.4
1924	7	6.7	154.2
1924	8	3.4	181
1924	9	3.7	155.2
1924	10	-0.8	243
1924	11	-2.7	29.1
1924	12	-5.9	91.4
1925	1	-5	36.9
1925	2	-8.3	91.5
1925	3	-9.5	182.6
1925	4	-4.6	285
1925	5	0.1	180.8
1925	6	4.8	67.4
1925	7	5.4	136.6
1925	8	5.9	230.9
1925	9	1.1	188.5
1925	10	0.6	52
1925	11	-6.1	150.6
1925	12	-8.5	328.8
1926	1	-8.6	210.4
1926	2	-4.2	199.2
1926	3	-6.1	160.5
1926	4	-3	234.5
1926	5	-1.7	265.4
1926	6	1.4	149.6
1926	7	4.9	152.9
1926	8	7.7	126.6
1926	9	5.9	60.5
1926	10	-0.1	272.7
1926	11	-3.8	295.9
1926	12	-8	150.5
1927	1	-9.2	178.1
1927	2	-8.4	163.9
1927	3	-7.3	322.2
1927	4	-3.1	188.4
1927	5	1.2	98.9
1927	6	3.8	171.5
1927	7	6.7	161.9
1927	8	6.3	255.8
1927	9	3.2	263.6
1927	10	0.8	76
1927	11	-4.3	162.4
1927	12	-7.4	158.7
1928	1	-7.9	144.4
1928	2	-6.6	210.7
1928	3	-7.2	173.1
1928	4	-4.5	361.2
1928	5	-1.9	110.7
1928	6	4.6	119.2
1928	7	10.2	18.7
1928	8	9.5	57.6
1928	9	4.5	127.6
1928	10	-1	269.4
1928	11	-5.3	408.4
1928	12	-9.3	138
1929	1	-11.6	91
1929	2	-11.3	52.5
1929	3	-4.9	13.5
1929	4	-5.6	184
1929	5	0.3	93.1
1929	6	4.8	225.6
1929	7	7.6	130
1929	8	7.2	160
1929	9	6.7	30.9
1929	10	-0.9	165.4
1929	11	-5.2	131
1929	12	-7.2	271.6
1930	1	-6	175.3
1930	2	-10.6	86.3
1930	3	-5.8	185
1930	4	-3.9	300.7
1930	5	-1.2	345
1930	6	6.2	97.7
1930	7	5.3	229.7
1930	8	7.3	99.5
1930	9	4.4	157.2
1930	10	-0.9	403.4
1930	11	-2.8	284
1930	12	-6.5	142.4
1931	1	-9.7	219.1
1931	2	-11.4	212.8
1931	3	-6.8	198
1931	4	-4.9	152.6
1931	5	1.7	198.3
1931	6	7.7	55
1931	7	6.6	120.5
1931	8	5	256.4
1931	9	-0.3	145
1931	10	0.1	110.9
1931	11	-3.3	192.2
1931	12	-7.5	93
1932	1	-5.2	152.5
1932	2	-10.8	38.5
1932	3	-8.2	210.6
1932	4	-7	268.5
1932	5	-0.9	372.1
1932	6	2.4	131.1
1932	7	5.1	241.9
1932	8	9.1	93.1
1932	9	6.8	94.9
1932	10	-1.7	279.7
1932	11	-3.5	58.6
1932	12	-5.4	121.8
1933	1	-10.8	104.2
1933	2	-8.3	158.3
1933	3	-6.1	173.5
1933	4	-2.6	168.3
1933	5	-1.1	289.3
1933	6	1.3	237.9
1933	7	8	122.7
1933	8	8.9	38
1933	9	4.4	267.3
1933	10	-0.5	220.1
1933	11	-8.1	237.6
1933	12	-9	80
1934	1	-8.1	200.7
1934	2	-5.5	40
1934	3	-7	249.5
1934	4	-2.2	179.9
1934	5	2.4	135.2
1934	6	4	236.3
1934	7	8.4	110.2
1934	8	5.6	132.8
1934	9	5.4	85.8
1934	10	-0.3	202.9
1934	11	-5.3	279.5
1934	12	-5	229.6
1935	1	-11.2	178.6
1935	2	-8.3	319.9
1935	3	-8.9	207.6
1935	4	-5.4	276.7
1935	5	-2	187
1935	6	6.1	111.5
1935	7	7.7	87.7
1935	8	6.1	210.8
1935	9	5.2	112.9
1935	10	-1.3	299.8
1935	11	-4.8	377.8
1935	12	-9.7	392.6
1936	1	-6.6	412
1936	2	-8.8	208.3
1936	3	-6.4	204.1
1936	4	-4.7	340.7
1936	5	0.5	99.1
1936	6	2.7	120.6
1936	7	5.9	129
1936	8	7.2	59.7
1936	9	3.3	316.2
1936	10	-3.9	142.1
1936	11	-4.9	154.8
1936	12	-6	211.6
1937	1	-6.2	156.9
1937	2	-7.1	438.2
1937	3	-8.9	349.3
1937	4	-5	129.5
1937	5	1.1	228.6
1937	6	4.1	186.7
1937	7	7.4	79.9
1937	8	6.6	104.8
1937	9	3	317
1937	10	-0.3	230.2
1937	11	-4.5	137.5
1937	12	-9.9	181.2
1938	1	-7.9	270.3
1938	2	-8.1	120.9
1938	3	-3.2	62.9
1938	4	-6.4	64.1
1938	5	-1.8	226.7
1938	6	6.2	186.2
1938	7	6.3	172.7
1938	8	6.2	160.2
1938	9	3.3	203
1938	10	0.9	150.1
1938	11	-1.2	137.8
1938	12	-8.9	172.4
1939	1	-8.1	271.4
1939	2	-5.8	86.8
1939	3	-10.7	236.4
1939	4	-2.6	350.1
1939	5	-2.6	252.7
1939	6	3.7	158.9
1939	7	5.7	101.6
1939	8	6.8	172.8
1939	9	3.2	101.5
1939	10	-2.4	338.2
1939	11	-3	265.5
1939	12	-8.6	154.9
1940	1	-9.5	134.1
1940	2	-7	199.2
1940	3	-6.2	254.5
1940	4	-4.8	282.8
1940	5	-0.2	131.2
1940	6	3	162.2
1940	7	4.9	214.3
1940	8	6.4	124.4
1940	9	4.4	308.7
1940	10	-1.6	205.5
1940	11	-5	231.7
1940	12	-11	281.9
1941	1	-9.7	245.5
1941	2	-8.9	210.7
1941	3	-6.1	137.8
1941	4	-5.2	273.6
1941	5	-3.2	315.3
1941	6	4.1	158
1941	7	7.1	79.4
1941	8	5.1	204.4
1941	9	4.5	45.1
1941	10	-2.5	256.7
1941	11	-6.6	169.9
1941	12	-7.5	105
1942	1	-12.3	208.9
1942	2	-11.4	81.2
1942	3	-4.1	143.7
1942	4	-3.2	163.1
1942	5	0.3	153.3
1942	6	5.5	96
1942	7	6.8	161.9
1942	8	7	142.7
1942	9	5.5	169.9
1942	10	2.2	253.9
1942	11	-5.6	128.2
1942	12	-6.7	152.3
1943	1	-7.9	304.4
1943	2	-6.9	132.8
1943	3	-5.1	150.5
1943	4	-2	199.5
1943	5	2.1	204.4
1943	6	3.9	174.5
1943	7	7.1	120.1
1943	8	8.8	74
1943	9	5.5	147.1
1943	10	1.1	84.3
1943	11	-6.6	233.2
1943	12	-7.2	155.6
1944	1	-5.2	145.8
1944	2	-11.9	203.5
1944	3	-9.6	150.2
1944	4	-2.4	100.9
1944	5	0.8	90.5
1944	6	3.3	155.7
1944	7	6.3	191.7
1944	8	9.4	106.2
1944	9	3.6	131.6
1944	10	-3.5	360.4
1944	11	-6.4	581.1
1944	12	-9.6	215.7
1945	1	-13.8	297.5
1945	2	-4.2	276.9
1945	3	-5.1	164.2
1945	4	-1.5	125
1945	5	2.2	176.8
1945	6	5.9	104.1
1945	7	8.7	86.5
1945	8	6.4	215
1945	9	4.7	104.1
1945	10	0.1	170
1945	11	-5.7	91.3
1945	12	-8.3	378
1946	1	-9	239.2
1946	2	-7.8	367.4
1946	3	-5.2	157.8
1946	4	-1	57
1946	5	0.2	173.3
1946	6	3.2	201.6
1946	7	7.6	110.7			-0.275
1946	8	6.8	218.8			8.26667
1946	9	6.1	110.5
1946	10	-0.8	58.9
1946	11	-4.7	81.7
1946	12	-10.1	196.1
1947	1	-10.5	152.3
1947	2	-10.2	159.1
1947	3	-5.5	406.4
1947	4	-0.4	79.5
1947	5	2.3	265.2
1947	6	6.8	129.2
1947	7	9.6	67.6
1947	8	9.2	60.4
1947	9	6	184.9
1947	10	1.1	106.3
1947	11	-2.9	247.7
1947	12	-8.8	321.6
1948	1	-6.7	330.8
1948	2	-8.1	128.7
1948	3	-1.9	55.1
1948	4	-3.3	308.3
1948	5	1.1	142.2
1948	6	2.9	249.4
1948	7	4.1	159.2
1948	8	6.8	175.8
1948	9	4.8	170.6
1948	10	1.3	84.9
1948	11	-0.6	79.7
1948	12	-6.2	85.7
1949	1	-6.3	134.6
1949	2	-5.3	24.9
1949	3	-8.3	63.1
1949	4	-0.2	171
1949	5	-0.6	269.8
1949	6	4.4	115.2
1949	7	8.4	51.5
1949	8	7.7	96.8
1949	9	6.3	127.7
1949	10	1.7	66.1
1949	11	-6.8	264.3
1949	12	-5.7	120.3
1950	1	-7.5	141.8
1950	2	-7	283
1950	3	-5	38.5
1950	4	-5.5	186
1950	5	1.5	174.6
1950	6	6.8	74
1950	7	9.7	41.9
1950	8	7.3	159.6
1950	9	3.4	211.2
1950	10	0	30.8
1950	11	-5.7	339.2
1950	12	-11	163.8
1951	1	-8.4	171.2
1951	2	-9.7	274.5
1951	3	-8.6	149.7
1951	4	-4.3	116.8
1951	5	-0.4	249.9
1951	6	3.9	143.9
1951	7	7.5	160.8
1951	8	6.8	200.1
1951	9	5.6	92.7
1951	10	-0.8	70.5
1951	11	-4.6	477
1951	12	-5	159.1
1952	1	-10.4	264.3
1952	2	-10.1	140.8
1952	3	-5.6	261.5
1952	4	-1.5	124.8
1952	5	0.8	136.9
1952	6	6	99.3
1952	7	9.6	26.5
1952	8	7.5	158.9
1952	9	0.2	163.3
1952	10	-1.8	273.2
1952	11	-8.2	307.7
1952	12	-8.5	313.2
1953	1	-9.3	62.7
1953	2	-8.7	105.3
1953	3	-5.2	9.8
1953	4	-2.4	240.9
1953	5	2	138.1
1953	6	2.3	333.3
1953	7	7.2	118.5
1953	8	7.5	105.3
1953	9	5	194.3
1953	10	1	249
1953	11	-1.2	76.1
1953	12	-5.5	89.8
1954	1	-10.7	177.2
1954	2	-9	151.1
1954	3	-5.8	191.3
1954	4	-4.6	211.5
1954	5	-0.3	149.6
1954	6	4	145.4
1954	7	4.1	131.4
1954	8	4.8	240.6
1954	9	3.9	195.5
1954	10	0.2	110.8
1954	11	-4.1	114.6
1954	12	-5.2	297.2
1955	1	-6.3	540.5
1955	2	-10	358.6
1955	3	-7.6	84.4
1955	4	-3.6	46.2
1955	5	-0.4	197.8
1955	6	3.6	210.9
1955	7	6.4	110.4
1955	8	5.5	170.4
1955	9	3.1	79.6
1955	10	-1.4	105.1
1955	11	-4.5	57.7
1955	12	-4.8	289.6
1956	1	-6.9	300.1
1956	2	-16.2	71.3
1956	3	-7.8	157.2
1956	4	-5.9	285
1956	5	0.6	183.6
1956	6	1.4	96.1
1956	7	6.7	202.1
1956	8	5.9	201.5
1956	9	5.1	160.2
1956	10	-1.6	140.9
1956	11	-6.4	84.4
1956	12	-6.9	55.4
1957	1	-7.4	100.5
1957	2	-6.4	402.7
1957	3	-1.8	81.2
1957	4	-3.6	141.3
1957	5	-2.2	222
1957	6	4.4	284
1957	7	6.6	124.8
1957	8	6.1	131.3
1957	9	3.6	115.4
1957	10	1.4	63.9
1957	11	-2.7	140.7
1957	12	-7	87.1
1958	1	-8.1	311.5
1958	2	-5.9	413.2
1958	3	-9	171.4
1958	4	-6.4	222.1
1958	5	2.9	237.9
1958	6	3.3	233.6
1958	7	7.1	109.7
1958	8	8.2	109.5
1958	9	6.6	107.2
1958	10	-0.5	219.1
1958	11	-3.8	181.8
1958	12	-6.5	385.7
1959	1	-8.3	279.3
1959	2	-5.1	49.8
1959	3	-4.7	241.1
1959	4	-2.8	308.3
1959	5	0.2	73
1959	6	4.2	106.6
1959	7	8.4	113.2
1959	8	5.9	88.6
1959	9	5.3	46.6
1959	10	-0.3	147.1
1959	11	-5.5	172.3
1959	12	-7.6	349.7
1960	1	-8.9	253.3
1960	2	-6.9	189.3
1960	3	-6.6	175.1
1960	4	-3.8	127.7
1960	5	1.6	157.6
1960	6	4.9	218.2
1960	7	4.5	162.3
1960	8	5.6	165.5
1960	9	1.9	329.3
1960	10	-3	386.4
1960	11	-5.2	224.1
1960	12	-7.9	209.9
1961	1	-7.9	196.1
1961	2	-4	171.2
1961	3	-4.1	50.3
1961	4	-1.2	238.9
1961	5	-0.8	117.1
1961	6	5	144.7
1961	7	5.1	137.5
1961	8	7	119.6
1961	9	7.2	83.8
1961	10	0.1	177.7
1961	11	-4.9	193.3
1961	12	-5.5	231
1962	1	-7.6	312.4
1962	2	-8.8	170.8
1962	3	-10.7	251.8
1962	4	-5.3	199.9
1962	5	-1.1	142.7
1962	6	3	39.1
1962	7	6.1	52.7
1962	8	9.3	31.9
1962	9	4.1	109.7
1962	10	1.3	138.6
1962	11	-7	318.1
1962	12	-9.3	330.6
1963	1	-12.7	129.2
1963	2	-12.4	178.8
1963	3	-6.5	282
1963	4	-3.1	98.2
1963	5	-0.4	99.9
1963	6	3.8	237.6
1963	7	8	85.8
1963	8	5.4	282.3
1963	9	3.9	131.8
1963	10	1.4	121.6
1963	11	-3.3	395.6
1963	12	-7.7	57.3
1964	1	-5.8	33
1964	2	-6.6	86.7
1964	3	-6.6	270.7
1964	4	-2.6	248.1
1964	5	2.6	196.5
1964	6	5.6	154.2
1964	7	8.3	125.3
1964	8	6.3	169.9
1964	9	5.2	154.4
1964	10	-3.1	201.2
1964	11	-2.7	145.1
1964	12	-7.4	87.1
1965	1	-8.6	172.7
1965	2	-12.3	63.1
1965	3	-7.4	244.2
1965	4	-5.8	226.2
1965	5	0	216.8
1965	6	5.1	177.4
1965	7	5.8	181.2
1965	8	5.6	169.2
1965	9	1.5	373.9
1965	10	2.4	30.1
1965	11	-6.5	327.6
1965	12	-7	394.2
1966	1	-8.7	185.8
1966	2	-4.4	361.6
1966	3	-8.3	161.2
1966	4	-2.7	225
1966	5	0.7	106.8
1966	6	4.4	60.1
1966	7	4.8	139.8
1966	8	5.7	114
1966	9	6.5	47
1966	10	0.4	290.7
1966	11	-9	230.1
1966	12	-7.7	263.7
1967	1	-8.6	97.3
1967	2	-8.2	229.5
1967	3	-6	279.2
1967	4	-5.2	127.4
1967	5	-0.6	232.9
1967	6	2.7	84.2
1967	7	8.2	87.4
1967	8	7.1	63.5
1967	9	3.5	83.1
1967	10	2.9	88.4
1967	11	-2.8	161.2
1967	12	-8.1	125.6
1968	1	-9.2	327.8
1968	2	-7.8	162.1
1968	3	-6.4	116.7
1968	4	-2.6	138
1968	5	-0.8	225.6
1968	6	3.8	126
1968	7	6.5	144.1
1968	8	4.5	247.9
1968	9	3	202.3
1968	10	3.1	52.6
1968	11	-3.7	292.5
1968	12	-9.3	272.4
1969	1	-6.9	123.6
1969	2	-12.5	191.6
1969	3	-7.2	126.4
1969	4	-5.2	285.7
1969	5	1.2	218.9
1969	6	1.9	180.5
1969	7	7.3	194.1
1969	8	5.4	272.7
1969	9	4.5	98.8
1969	10	3.2	17
1969	11	-5.4	212.4
1969	12	-10.8	154.3
1970	1	-7.5	178
1970	2	-10.2	434.2
1970	3	-10	217.7
1970	4	-6.3	264.7
1970	5	-1.3	182
1970	6	4.5	119.4
1970	7	6.4	168.7
1970	8	6.7	103.4
1970	9	6.2	66.1
1970	10	0.3	241.4
1970	11	-2.8	222.6
1970	12	-8.2	104.7
1971	1	-8.9	165.9
1971	2	-8.5	93.9
1971	3	-10.8	224.5
1971	4	-2.1	157.4
1971	5	1	202.2
1971	6	2.4	219.1
1971	7	8.2	58.3
1971	8	8.6	178.7
1971	9	4.1	45.7
1971	10	2.8	35.2
1971	11	-5.6	262.9
1971	12	-3.3	70.2
1972	1	-8.8	86.7
1972	2	-7.7	289.2
1972	3	-5.3	174.7
1972	4	-4.6	202.5
1972	5	-0.8	168.8
1972	6	3	189.1
1972	7	6	96.5
1972	8	5.5	138
1972	9	0.9	90.8
1972	10	0	146.7
1972	11	-3.8	316.9
1972	12	-6.1	126.7
1973	1	-7.8	105
1973	2	-10.6	106.1
1973	3	-8	45.2
1973	4	-7.6	215
1973	5	0.9	143.3
1973	6	4.6	254.5
1973	7	5.6	242.3
1973	8	8.2	133.2
1973	9	5.2	109
1973	10	-1	209.3
1973	11	-3.8	129.1
1973	12	-8	258.1
1974	1	-5.4	131.8
1974	2	-8.2	307.1
1974	3	-5.9	198.9
1974	4	-4.6	123.4
1974	5	-0.7	196.1
1974	6	2.3	214.2
1974	7	6.1	108.1
1974	8	7.4	108.3
1974	9	2.3	239
1974	10	-8.1	273
1974	11	-5.9	251.6
1974	12	-5.6	169.1
1975	1	-5.1	244.5
1975	2	-6.7	67.4
1975	3	-8.8	289
1975	4	-4	120.4
1975	5	0.8	206.3
1975	6	2.6	133
1975	7	7.3	87.7
1975	8	6.9	226.3
1975	9	5.3	211.7
1975	10	-0.2	159.5
1975	11	-5.6	272.9
1975	12	-5.3	50.7
1976	1	-8.1	63.7
1976	2	-6.7	108.4
1976	3	-6.7	43
1976	4	-4.4	127
1976	5	1.6	89.8
1976	6	6.4	106.9
1976	7	6.8	137.9
1976	8	5.1	152.2
1976	9	1.7	203.4
1976	10	0.3	362.5
1976	11	-6.5	299.8
1976	12	-9.1	285.1
1977	1	-8.9	265.4
1977	2	-7.1	302.9
1977	3	-4.3	249.6
1977	4	-4.7	270
1977	5	-0.8	238.3
1977	6	2.7	186.8
1977	7	5.8	271.9
1977	8	4.7	182.5
1977	9	3.1	50.7
1977	10	1.2	402.9
1977	11	-6.3	233.8
1977	12	-5.3	155.9
1978	1	-8.9	321.7
1978	2	-9.3	325.7
1978	3	-6.6	337.6
1978	4	-6	161.4
1978	5	-0.6	221.4
1978	6	2.6	111.9
1978	7	5.6	131.2
1978	8	5.8	158
1978	9	4.5	44.7
1978	10	1.3	91.9
1978	11	-2.7	28.3
1978	12	-6.3	323.6
1979	1	-11	181.6
1979	2	-7.6	193.8
1979	3	-6.7	324.3
1979	4	-6.4	119.5
1979	5	0	107.8
1979	6	5.5	100.4
1979	7	6.8	51
1979	8	5.7	261.3
1979	9	4.8	105.8
1979	10	1.1	325.5
1979	11	-5	239.9
1979	12	-6.4	306.2
1980	1	-10.4	221.9
1980	2	-6.6	202.6
1980	3	-7	200.9
1980	4	-7.5	130.3
1980	5	-1.2	156
1980	6	2.2	175.1
1980	7	4.5	208.5
1980	8	7.3	105.1
1980	9	5.6	131.9
1980	10	-0.1	331.9
1980	11	-3.9	155.9
1980	12	-8.1	181.9
1981	1	-9.2	197
1981	2	-8.9	56.3
1981	3	-3.5	322.3
1981	4	-1.7	130.3
1981	5	0.3	326.1
1981	6	5	157.2
1981	7	6	264.1
1981	8	8.5	54
1981	9	3.6	162.7
1981	10	-0.6	283.7
1981	11	-4	318.3
1981	12	-10.1	671.6
1982	1	-6.4	282.4
1982	2	-7.3	28.1
1982	3	-8.6	276.9
1982	4	-4.3	103.1
1982	5	0.8	208.8
1982	6	5.2	88.8
1982	7	8.9	96.6
1982	8	6.8	152.4
1982	9	6	103.7
1982	10	-1.1	376.9
1982	11	-3.8	252.7
1982	12	-6.4	327.8
1983	1	-4.5	216.2
1983	2	-10.1	167.6
1983	3	-5.1	145.7
1983	4	-4.3	426
1983	5	-1.7	421.2
1983	6	4.2	95.6
1983	7	11.1	7.8
1983	8	6.4	140.8
1983	9	5.6	138.9
1983	10	1.4	136.2
1983	11	-1.8	245.1
1983	12	-5.8	205.8
1984	1	-9.2	397.8
1984	2	-10.8	263.8
1984	3	-9.3	164.2
1984	4	-5	127.9
1984	5	-2.7	317
1984	6	3.1	172.9
1984	7	7.1	92.4
1984	8	5.7	111.2
1984	9	2	265.2
1984	10	0.5	92.7
1984	11	-2.6	176.7
1984	12	-6.1	111
1985	1	-13.4	180
1985	2	-5.9	206.4
1985	3	-8.6	229.1
1985	4	-3.9	217.9
1985	5	-0.1	240.7
1985	6	2.9	263.8
1985	7	8.9	52.1
1985	8	7.4	195.9
1985	9	7.1	59.8
1985	10	2.5	12.9
1985	11	-6.8	239.2
1985	12	-4	65.9
1986	1	-10	581.5
1986	2	-12.3	114.9
1986	3	-6.4	202.2
1986	4	-5	532.4
1986	5	2.2	171
1986	6	4.8	145.5
1986	7	6.9	109.5
1986	8	7	172.2
1986	9	5.6	87.8
1986	10	2	155.8
1986	11	-3.1	143.3
1986	12	-6.9	335.1
1987	1	-8.7	238.5
1987	2	-7.4	264.6
1987	3	-9.5	209.2
1987	4	-2.8	193.4
1987	5	-1.8	225.2
1987	6	2.8	259.6
1987	7	7.3	169.9
1987	8	8	102.3
1987	9	8.4	54.5
1987	10	0.8	399.4
1987	11	-4.2	286.9
1987	12	-3.4	97.2
1988	1	-6.9	377.9
1988	2	-9	307.7
1988	3	-8.5	607.4
1988	4	-2.7	119.5
1988	5	1.1	224.6
1988	6	3.5	131.3
1988	7	7.9	95.9
1988	8	8.5	88.9
1988	9	4.7	123.5
1988	10	2.4	280.9
1988	11	-3.1	62.6
1988	12	-5.1	349
1989	1	-3.5	9.9
1989	2	-4.9	185.1
1989	3	-3.2	209.1
1989	4	-5.5	625.8
1989	5	1.7	73
1989	6	3.8	47.3
1989	7	7.9	183
1989	8	7.5	120.8
1989	9	3.8	70
1989	10	2.2	136.4
1989	11	-3.6	106.5
1989	12	-3.5	296.9
1990	1	-5.9	97.2
1990	2	-3.7	527.7
1990	3	-3.7	138.5
1990	4	-4.7	224.6
1990	5	2.6	77.2
1990	6	4.3	222.4
1990	7	8.3	38.1
1990	8	8.4	79.4
1990	9	4.3	97.1
1990	10	1.8	286.7
1990	11	-5.2	220.5
1990	12	-8.2	132.2
1991	1	-6.2	167.2
1991	2	-10	96.9
1991	3	-3.9	233.1
1991	4	-5.3	165.2
1991	5	-2.6	144.5
1991	6	3.6	152
1991	7	9.2	114
1991	8	9.8	51.2
1991	9	6.5	170.2
1991	10	-0.9	185.1
1991	11	-4.4	238.4
1991	12	-5.9	294.1
1992	1	-5.1	37.4
1992	2	-5.9	161.4
1992	3	-5.3	139.1
1992	4	-3.2	161.4
1992	5	2.8	73.6
1992	6	3.2	242.9
1992	7	8.2	96.3
1992	8	10.3	139.2
1992	9	4.4	148
1992	10	-2.3	304.4
1992	11	-1.1	405.2
1992	12	-5.3	206.9
1993	1	-4	90.2
1993	2	-7	72
1993	3	-6.4	88.1
1993	4	-3	278
1993	5	1.7	94.7
1993	6	5.3	150.7
1993	7	6.3	236.6
1993	8	8.7	88.9
1993	9	2.5	320.5
1993	10	-1.4	287
1993	11	-6.1	33.2
1993	12	-6.1	488.2
1994	1	-6.9	514.9
1994	2	-8.4	115.3
1994	3	-2.1	132.4
1994	4	-4.8	313.8
1994	5	1.7	274.2
1994	6	5.2	167.8
1994	7	10.4	77.8
1994	8	9.7	127.8
1994	9	3.1	282.7
1994	10	1.1	126.5
1994	11	-0.2	275
1994	12	-4.7	209.6
1995	1	-9.1	369.3
1995	2	-4.9	429.8
1995	3	-7.9	334
1995	4	-2.4	348.6
1995	5	0.4	407.1
1995	6	3	102.6
1995	7	9.7	64.1
1995	8	6.3	134.4
1995	9	1.3	263.8
1995	10	4.2	43.4
1995	11	-4.7	204.9
1995	12	-7.1	134.2
1996	1	-6.1	188.4
1996	2	-10.3	186.8
1996	3	-7.3	73.2
1996	4	-2.9	77.9
1996	5	1.1	230.9
1996	6	6.1	85.6
1996	7	6.8	229.1
1996	8	6.1	130.2
1996	9	1.3	83.7
1996	10	0.2	237.5
1996	11	-4.9	821
1996	12	-6.6	148.4
1997	1	-6.1	82.5
1997	2	-4.5	349.8
1997	3	-3.2	165.6
1997	4	-3.6	114.9
1997	5	1.9	182.1
1997	6	4.2	274.7
1997	7	6	234.3
1997	8	8.9	143.1
1997	9	7.4	90.9
1997	10	1.4	176.7
1997	11	-3.7	151.5
1997	12	-6.8	302.3
1998	1	-6.7	322.4
1998	2	-2.7	71.1
1998	3	-4.9	108.5
1998	4	-4.2	313.1
1998	5	2.1	79.1
1998	6	6.1	174.1
1998	7	8.3	131.3
1998	8	9	73.6
1998	9	3.4	202
1998	10	-0.3	340.4
1998	11	-7.4	192.5
1998	12	-6.3	88
1999	1	-6.5	382
1999	2	-9.1	516.8
1999	3	-5.5	164.9
1999	4	-3.8	291
1999	5	3.1	266.3
1999	6	4.5	214.9
1999	7	7.9	154
1999	8	8.4	128.3
1999	9	5.8	155.6
1999	10	1.2	177.7
1999	11	-5.9	198.9
1999	12	-7	452.8
2000	1	-7.4	93.3
2000	2	-5.7	323.9
2000	3	-5	183.8
2000	4	-2.7	304.7
2000	5	2.8	117
2000	6	6.9	133.3
2000	7	5.4	218.3
2000	8	8.9	123.5
2000	9	5.6	225.9
2000	10	0.3	430.6
2000	11	-5.1	374.9
2000	12	-5.4	201.8
2001	1	-7.9	164.4
2001	2	-7.1	96.2
2001	3	-3.5	440.8
2001	4	-4.9	266.7
2001	5	2.9	158.6
2001	6	4.4	292.6
2001	7	7.7	166.5
2001	8	9.3	88
2001	9	0.7	192.1
2001	10	4.1	82.7
2001	11	-4	158.6
2001	12	-7.9	111.7
2002	1	-5.1	78.6
2002	2	-5.5	349.9
2002	3	-4.4	254.4
2002	4	-3.2	121
2002	5	0.6	415.3
2002	6	7.9	202.8
2002	7	7.4	164.2
2002	8	6.6	244.9
2002	9	2.8	167.4
2002	10	0.9	164.1
2002	11	-3.5	731.7
2002	12	-5.2	195.2
2003	1	-9.2	251.8
2003	2	-10.6	129.7
2003	3	-3.4	78.6
2003	4	-3.2	211.8
2003	5	2.7	84.9
2003	6	10.6	94
2003	7	9.2	89.5
2003	8	11.8	87.9
2003	9	4.8	74.5
2003	10	-2.1	341.2
2003	11	-1.9	215.2
2003	12	-6.2	286.3
2004	1	-8	460.4
2004	2	-6.5	130.5
2004	3	-6.7	90.1
2004	4	-3.5	229.3
2004	5	0.2	172.9
2004	6	5.7	111.2
2004	7	7.2	97.6
2004	8	7.9	195.7
2004	9	5.7	57.4
2004	10	2	246
2004	11	-3.8	196.4
2004	12	-5.7	159.1
2005	1	-7.6	301.8
2005	2	-12.1	164.3
2005	3	-5.6	79.3
2005	4	-2.9	392.5
2005	5	2.2	135.2
2005	6	7.5	86.9
2005	7	7.5	112.8
2005	8	5.9	268.3
2005	9	5.1	109.7
2005	10	2.4	126.9
2005	11	-5	52.6
2005	12	-8.7	222.9
2006	1	-8.6	79.1
2006	2	-8.4	129.5
2006	3	-7	410.5
2006	4	-2.6	191.9
2006	5	1.2	253.5
2006	6	6.5	91.5
2006	7	11.2	59.6
2006	8	3.8	252.6
2006	9	6.8	171.1
2006	10	3.5	113.6
2006	11	-1.8	107
2006	12	-4.1	184.6
2007	1	-4.3	252.1
2007	2	-4.6	243.4
2007	3	-5.7	157.3
2007	4	1.6	13.5
2007	5	2.2	341.6
2007	6	5.9	250.9
2007	7	7.3	236
2007	8	7.1	284.4
2007	9	3.5	86.5
2007	10	1.2	55.3
2007	11	-4.6	196.2
2007	12	-6.6	396.1
2008	1	-4.8	316.5
2008	2	-4	57.7
2008	3	-6.9	282.6
2008	4	-4.3	249.9
2008	5	2	183.4
2008	6	6	155.5
2008	7	7.7	163.2
2008	8	8.3	113
2008	9	3.5	147.1
2008	10	1.6	158.3
2008	11	-5.3	307.8
2008	12	-7.6	184.4
2009	1	-8.5	99
2009	2	-9.7	239.9
2009	3	-6.2	366.2
2009	4	-2	131.1
2009	5	3.4	94.6
2009	6	5.6	62.9
2009	7	8.3	123.3
2009	8	10.1	51.7
2009	9	6	63.6
2009	10	0.9	79.4
2009	11	-2.4	233.9
2009	12	-8.3	265.8
2010	1	-9.7	144.4
2010	2	-10	258.4
2010	3	-7	151
2010	4	-2.2	75.6
2010	5	-0.2	393.9
2010	6	5	113.4
2010	7	9.5	182.8
2010	8	7	132.8
2010	9	4	107
2010	10	-0.1	222.1
2010	11	-5.5	299.5
2010	12	-9.7	243.9
2011	1	-7.5	49.6
2011	2	-5.5	95.4
2011	3	-4.5	168.4
2011	4	0.3	65.4
2011	5	3.5	204.3
2011	6	5.6	238.4
2011	7	5.5	159.9
2011	8	9.6	86.5
2011	9	7.4	116.9
2011	10	1.7	234.8
2011	11	-1.1	175
2011	12	-5.9	649.2
2012	1	-6.6	436.4
2012	2	-10.6	91.5
2012	3	-2.4	68.9
2012	4	-3.7	310.2
2012	5	1.9	121.7
2012	6	7	144.9
2012	7	8.3	133.3
2012	8	10.2	190.9
2012	9	5.1	132.4
2012	10	1.7	99.9
2012	11	-2.6	264.1
2012	12	-7.9	460.4
2013	1	-7.5	138.4
2013	2	-11.7	154.8
2013	3	-7.2	127.1
2013	4	-1.8	230.2
2013	5	-1.6	275.2
2013	6	4.1	148.7
2013	7	9.4	135.6
2013	8	8.4	87.5
2013	9	5.6	102.2
2013	10	1.9	164.6
2013	11	-4.8	181.5
2013	12	-4	110.4
2014	1	-6.2	165
2014	2	-7.6	250
2014	3	-3.8	123.2
2014	4	-1	235.8
2014	5	0.1	189.1
2014	6	6.4	47.6
2014	7	6.5	246.3
2014	8	6.4	117.3
2014	9	5.4	53.1
2014	10	3	187.1
2014	11	-1.1	464.3
2014	12	-5.5	126.2
2015	1	-6.8	331.8
2015	2	-8.3	147.9
2015	3	-4.4	330
2015	4	-1.4	119.4
2015	5	2.5	219.8
2015	6	6.9	144.3
2015	7	11.9	86.2
2015	8	9	204.6
2015	9	2.9	114.7
2015	10	0.5	182.9
2015	11	0	222
2015	12	-0.8	12.9
2016	1	-6	425.9
2016	2	-6.1	280.7
2016	3	-6.7	117.8
2016	4	-2.6	247.6
2016	5	0.1	279.9
2016	6	5.4	101.6
2016	7	9.2	116.7
2016	8	9.1	55
2016	9	6.3	111.5
2016	10	0.2	109.4
2016	11	-3.8	348
2016	12	-2.9	26
2017	1	-9.1	161
2017	2	-5.4	202
2017	3	-2.1	330.4
2017	4	-2.4	170.4
2017	5	2.3	187.6
2017	6	8.9	92.7
2017	7	8.9	115.7
2017	8	9.8	121.8
2017	9	2.8	66.5
2017	10	3.3	65.1
2017	11	-4.2	158.9
2017	12	-7.5	329.5
2018	1	-5.4	829.9
2018	2	-11	92.4
2018	3	-7.3	181.4
2018	4	-0.4	137.3
2018	5	2.6	186.2
2018	6	7	62.1
2018	7	9.9	99.9
2018	8	9.5	100.6
2018	9	7.2	65.5
2018	10	2.5	296.5
2018	11	-3.4	233.7
2018	12	-4.5	324.2
2019	1	-10.1	280
2019	2	-3.5	99.7
2019	3	-4.4	266.7
2019	4	-3.5	284
2019	5	-1.2	242.9
2019	6	8.6	128.6
2019	7	10.2	114.4
2019	8	9.8	131.4
2019	9	6	64
2019	10	3	340.3
2019	11	-5.1	276.5
2019	12	-4	354.3
2020	1	-4.4	39.8
2020	2	-3.9	175.5
2020	3	-4.9	121.8
2020	4	0.2	70.2
2020	5	3.4	196.4
2020	6	4.8	99.7
2020	7	9.5	40.8
2020	8	9.2	115
2020	9	5.9	37.4
2020	10	-1.1	253.2
2020	11	-0.2	9.6
2020	12	-7.1	121.5
2021	1	-9.1	182.3
2021	2	-4.1	65.5
2021	3	-5.5	105.8
2021	4	-4.4	116.2
2021	5	-1.1	243.3
2021	6	7.2	105.6
2021	7	8.1	182.4
2021	8	7.8	61.7
2021	9	6.3	94
2021	10	1	120
