# Supplementary material for: Effects of topographic and meteorological parameters on the surface area loss of ice aprons in the Mont Blanc massif (European Alps)
Source: Copernicus journal article supplement (doi:10.5194/tc-16-4251-2022), 2022-10-12
Supplement: Supplementary file 1 [file tc-16-4251-2022-supplement.zip]

Archive with 3 entries (3 files):
- tc-16-4251-2022-supplement-title-page.pdf
- Supplementary material 2.pdf
- Supplementary material 1.xlsx
