# Supplementary material for: Effects of topographic and meteorological parameters on the surface area loss of ice aprons in the Mont Blanc massif (European Alps)
Source: Copernicus journal article supplement (doi:10.5194/tc-16-4251-2022), 2022-10-12
Supplement: Supplementary file 1 [file tc-16-4251-2022-supplement.zip › Supplementary material 2.pdf]

## Supplementary material 2

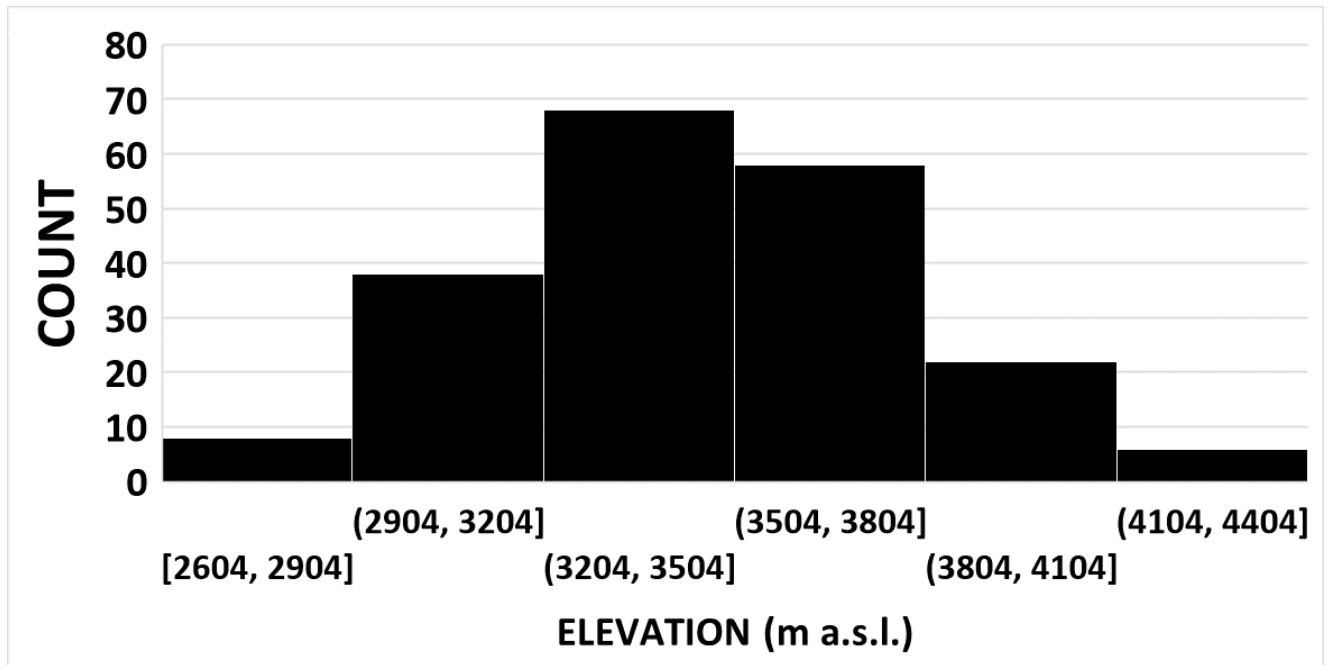

Figure 1: Distribution of ice aprons with elevation

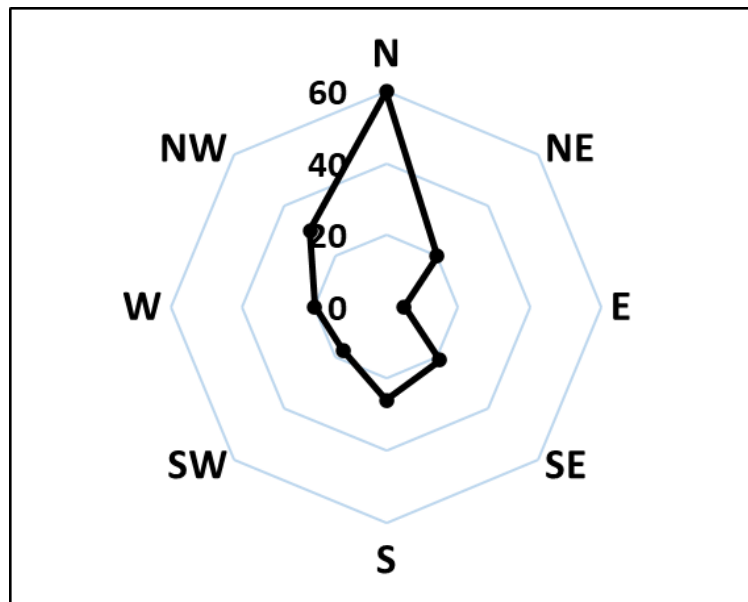

Figure 2: Distribution of ice aprons with the aspect
