# Supplementary material for: Effects of topographic and meteorological parameters on the surface area loss of ice aprons in the Mont Blanc massif (European Alps)
Source: Copernicus journal article supplement (doi:10.5194/tc-16-4251-2022), 2022-10-12
Supplement: Supplementary file 1 [file tc-16-4251-2022-supplement.zip › tc-16-4251-2022-supplement-title-page.pdf]

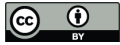

*Supplement of*

**Effects of topographic and meteorological parameters on the surface area loss of ice aprons in the Mont Blanc massif (European Alps)**

**Suvrat Kaushik et al.**

*Correspondence to:* Suvrat Kaushik ([suvrat.kaushik@univ-smb.fr](mailto:suvrat.kaushik@univ-smb.fr))

- [tc-16-4251-2022-supplement-title-page.pdf](#)
- [Supplementary material 1.xlsx](#)
- [Supplementary material 2.pdf](#)

The copyright of individual parts of the supplement might differ from the article licence.
